# Supplementary material for: Do goats recognise humans cross-modally?
Source: PeerJ. 2025 Jan 14;13:e18786. doi: 10.7717/peerj.18786 (PMC11740737; doi:10.7717/peerj.18786)
Supplement: Supplemental Information 2 [file peerj-13-18786-s002.xlsx]

## Sheet: Sheet1
File Name	Column Heading	Short for	Description
Both data files	goat.id	Goat ID	The identity of the goat tested.
Both data files	goat.sex	Goat Sex	The sex of the goat tested.
Both data files	trial	Trial Number	We aimed to test goats four times (in two congruent and two incongruent trials), but when something went wrong in a given trial, for example due to the weather, goats failing to respond to both playbacks or when we were experiencing technical difficulties with the speaker broadcasting playbacks, trials had to be repeated with goats experiencing up to six trials each.
Both data files	year	Year	The year a goat was tested (2020 or 2021).
Both data files	congruency	Congruency between stimuli	Goats were either subject to congruent cues where the face and voice shown were from the same person, or incongruent ones where these were from different people.
Both data files	responsive.to	Responsive to	The name of the preferred person for the goat being tested (anonymised).
Both data files	human.gender	Human Gender	The gender of the people providing facial and vocal cues for a given subject.
Both data files	photo	Photograph Identity	The name of the person providing the photograph shown in any given trial (anonymised).
Both data files	responsi.photo	Responsive photograph?	Whether the photograph shown came from the goat being tested's preferred person.
Both data files	voice	Voice Identity	The name of the person providing the voice sample broadcast for any given trial.
Both data files	responsi.voice	Responsive voice?	Whether the voice played came from the goat being testeds preferred person.
Both data files	prelim.dur	Preliminary Duration	Refers to the time (s) between the beginning of the trial and when the playbacks were initiated.
Both data files	pb.no	Playback Number	Whether a goat was responding to playback 1 or 2 of the playback sequence.
2b_BehavData_GoatCrossModalRecognHumans.csv	lat	Latency	How long it took goats to respond following the end of a given playback.
2b_BehavData_GoatCrossModalRecognHumans.csv	dur	Duration	How long goats looked in the 10s response period following a given playback.
2d_CardiacData_GoatCrossModalRecognHumans.csv	hr	Heart Rate	Goat heart rate measured in the 10s response period following each playback calculated as heartbeats per minute (BPM).
2d_CardiacData_GoatCrossModalRecognHumans.csv	baseline.hr	Baseline Heart Rate	Goat heart rate (BPM) measured in the 10s preceeding onset of playbacks. See Methods section for more details.
2d_CardiacData_GoatCrossModalRecognHumans.csv	d.hr	Delta Heart Rate	The difference in heart rate measured in the response periods following playback 1 and 2 compared to baseline heart rate.
2d_CardiacData_GoatCrossModalRecognHumans.csv	hrv	Heart Rate Variability	Calculated as root mean square of successive differences between heartbeats multiplied by 1000 (RMSSD) in the 10s response periods following each playback.
2d_CardiacData_GoatCrossModalRecognHumans.csv	baseline.hrv	Baseline Heart Rate Variability	Heart rate variability calculated in the 10s before onset of playbacks.
2d_CardiacData_GoatCrossModalRecognHumans.csv	d.hrv	Delta Heart Rate Variability	The difference in heart rate variability measured in the response periods following playback 1 and 2 compared to baseline heart rate variability.
2d_CardiacData_GoatCrossModalRecognHumans.csv	measure.per	Measurement Period	The total time we were able to calculate heart rate and heart rate variability following playbacks 1 and 2 (excluding noise in ECG trace).
